# Supplementary material for: AAV9-TAZ Gene Replacement Ameliorates Cardiac TMT Proteomic Profiles in a Mouse Model of Barth Syndrome
Source: PubMed Central journal article supplement — Mol Ther Methods Clin Dev. 2019 Jan 25;13:167–79. doi: 10.1016/j.omtm.2019.01.007 (PMC6369239; doi:10.1016/j.omtm.2019.01.007), 2019-01-25
Supplement: mmc1.pdf [file mmc1.pdf]

**OMTM, Volume 13**

**Supplemental Information**

**AAV9-TAZ Gene Replacement Ameliorates Cardiac**

**TMT Proteomic Profiles in a Mouse Model**

**of Barth Syndrome**

**Silveli Suzuki-Hatano, Madhurima Saha, Meghan S. Soustek, Peter B. Kang, Barry J. Byrne, W. Todd Cade, and Christina A. Pacak**

SUPPLEMENTAL DATA

**Supplemental Table 1:** Full list of significantly differentially expressed proteins in BTHS as compared to WT by TMT analysis with 6 pursued hits highlighted in yellow. Fold change values as compared to WT are listed for each group.

| <b>Accession:</b> | <b>BTHS</b> | <b>AAV-TAZAd</b> | <b>AAV-TAZNeo</b> |
|-------------------|-------------|------------------|-------------------|
| <b>Q922B1</b>     | -1.21424023 | -0.529072743     | -0.858567209      |
| <b>O70433</b>     | -1.19264508 | -0.147202107     | 0.544485386       |
| <b>Q9WV35</b>     | -1.14720211 | -0.528032212     | -0.275786313      |
| <b>Q9D7J9</b>     | -1.09387905 | -0.437330174     | 0.010063683       |
| <b>P51885</b>     | -0.9686048  | -0.53428668      | 0.12895322        |
| <b>P0DN34</b>     | -0.93926084 | -0.475936324     | 0.096261853       |
| <b>Q91ZE0</b>     | -0.90914657 | 0.014355293      | 0.102993993       |
| <b>P16045</b>     | -0.88496676 | -0.432454552     | -0.006506779      |
| <b>Q8C6I2</b>     | -0.81476775 | -0.107026185     | 0.337996464       |
| <b>P97315</b>     | -0.78090894 | -0.271426397     | 0.351062899       |
| <b>Q8C547</b>     | -0.76366046 | -0.066427362     | 0.096936483       |
| <b>Q4VAE3</b>     | -0.75633092 | -0.380821784     | 0.18142064        |
| <b>Q9ERS2</b>     | -0.75511294 | -0.431481402     | 0.153156788       |
| <b>Q9CQ75</b>     | -0.75511294 | -0.650634722     | 0.029982866       |
| <b>Q78J03</b>     | -0.75389599 | -0.220109961     | 0.204766751       |
| <b>P56375</b>     | -0.74903843 | -0.540568381     | 0.052415894       |
| <b>P04247</b>     | -0.72023158 | -0.706041021     | -0.007231569      |
| <b>Q8CC86</b>     | -0.71904369 | -0.526368923     | 0.005759269       |
| <b>P59266</b>     | -0.7095756  | 0.653518671      | 0.670840336       |
| <b>Q9CR61</b>     | -0.6978272  | -0.369594529     | 0.097610797       |
| <b>Q1XH17</b>     | -0.69432126 | -0.301337        | 0.097610797       |
| <b>Q8R0F8</b>     | -0.6931545  | -0.097733431     | 0.0614306         |
| <b>Q61425</b>     | -0.57346686 | -0.446148032     | 0.182692298       |
| <b>Q9CPU0</b>     | -0.55109905 | -0.149600603     | 0.340847077       |
| <b>Q9CQZ5</b>     | -0.53742411 | -0.277533976     | 0.21350282        |
| <b>Q9DC70</b>     | -0.53742411 | -0.242976753     | 0.197236355       |
| <b>Q8K4Q8</b>     | -0.52491512 | -0.024736678     | 0.332278283       |
| <b>Q8BWF0</b>     | -0.51766798 | -0.312939312     | 0.182692298       |
| <b>Q9CZJ2</b>     | -0.50942987 | -0.090802937     | 0.240619629       |
| <b>Q3U435</b>     | -0.49614247 | -0.303115909     | 0.132905812       |
| <b>Q8K0E8</b>     | -0.49005085 | -0.588248371     | 0.662661255       |

|               |             |              |             |
|---------------|-------------|--------------|-------------|
| <b>Q9CQ00</b> | -0.47593632 | -0.032831392 | 0.549422746 |
| <b>Q99JF5</b> | -0.47493341 | 0            | 0.380729449 |
| <b>Q9CQU0</b> | -0.47393119 | 0.112366523  | 0.44625623  |
| <b>Q99KP6</b> | -0.46693508 | -0.169744676 | 0.313245852 |
| <b>Q7TQ48</b> | -0.46494241 | -0.310253562 | 0.384602458 |
| <b>Q91ZM8</b> | -0.46295248 | -0.097733431 | 0.01720929  |
| <b>P28667</b> | -0.43733017 | 0.267835392  | 0.422771219 |
| <b>Q8CG76</b> | -0.37988284 | -0.139235797 | 0.43349364  |
| <b>Q61102</b> | -0.36215794 | -0.064163126 | 0.367930141 |
| <b>P38585</b> | -0.34831682 | -0.06340917  | 0.43349364  |
| <b>Q9D7N9</b> | -0.33551716 | -0.053643428 | 0.695993813 |
| <b>Q91WS0</b> | -0.33551716 | -0.035046947 | 0.448900951 |
| <b>Q9EP71</b> | -0.33278909 | -0.188528969 | 0.240008965 |
| <b>Q9CYG7</b> | -0.32644358 | -0.09157135  | 0.586884813 |
| <b>Q8VC03</b> | -0.3219281  | 0.224040274  | 0.396159489 |
| <b>Q99LC5</b> | -0.32102669 | -0.17869796  | 0.439357178 |
| <b>P62274</b> | -0.31563007 | 0.006477564  | 0.3950628   |
| <b>Q9JI39</b> | -0.31563007 | -0.015957574 | 0.364012054 |
| <b>P12787</b> | -0.31383567 | -0.070209002 | 0.502839758 |
| <b>Q3TCN2</b> | -0.30935942 | -0.157624512 | 0.197236355 |
| <b>Q63918</b> | -0.30668032 | -0.037265909 | 0.686164326 |
| <b>Q8VDP4</b> | -0.30400619 | 0.068326861  | 0.548436625 |
| <b>P50543</b> | -0.28982725 | -0.144010303 | 0.372394965 |
| <b>P68040</b> | -0.28718415 | -0.035786222 | 0.470927257 |
| <b>Q8K0C4</b> | -0.27928376 | 0.100977648  | 0.486971744 |
| <b>Q5FWJ8</b> | -0.24982229 | -0.195946441 | 0.159629186 |
| <b>P97346</b> | -0.2446851  | -0.205064337 | 0.337425664 |
| <b>Q8BGC0</b> | -0.18770716 | -0.031356244 | 0.439357178 |
| <b>P56480</b> | -0.18606493 | -0.092340172 | 0.548929769 |
| <b>Q9CQ62</b> | -0.18114944 | -0.087733372 | 0.50589093  |
| <b>P97313</b> | -0.17055632 | -0.017417053 | 0.40599236  |
| <b>Q99KV1</b> | -0.16326792 | -0.03209363  | 0.617298483 |
| <b>Q9JKY0</b> | -0.16326792 | 0.053111336  | 0.420617139 |
| <b>Q62418</b> | -0.16165326 | 0.121015401  | 0.562669826 |
| <b>Q9WU84</b> | -0.16004041 | 0.07244885   | 0.49978212  |
| <b>Q62422</b> | -0.15440959 | 0.074505436  | 0.497740089 |
| <b>Q9R1T2</b> | -0.1496006  | 0.012211084  | 0.425459305 |
| <b>Q91YR7</b> | -0.13526908 | 0.071076162  | 0.535057595 |

|               |             |              |             |
|---------------|-------------|--------------|-------------|
| <b>Q9D0M3</b> | -0.12579321 | -0.051399153 | 0.492109553 |
| <b>Q9JIF7</b> | -0.12500636 | -0.040229845 | 0.570462931 |
| <b>P62192</b> | -0.12343394 | 0.055195654  | 0.701327257 |
| <b>Q9CYD3</b> | -0.11536301 | 0.073820233  | 0.364572432 |
| <b>Q8K2Y7</b> | -0.10314693 | -0.160846613 | 0.443076151 |
| <b>Q8QZY1</b> | -0.09234017 | 0.074505436  | 0.530570204 |
| <b>Q9JJI8</b> | -0.08543548 | -0.028410464 | 0.479230561 |
| <b>Q9CT10</b> | -0.08008791 | 0.118359726  | 0.591200673 |
| <b>Q99KI0</b> | -0.06945188 | 0.007195501  | 0.635986504 |
| <b>Q9EPU0</b> | -0.0671829  | 0.085424656  | 0.478713002 |
|               |             |              |             |
| <b>Q91YP0</b> | 0.039840265 | 0.209141398  | 0.50589093  |
| <b>O09061</b> | 0.053806444 | 0.13553487   | 0.641546029 |
| <b>Q8R059</b> | 0.141432791 | 0.201633861  | 0.644317778 |
| <b>Q3UE20</b> | 0.14208663  | 0.10701825   | 0.54399072  |
| <b>Q3UE37</b> | 0.224657734 | -0.015228388 | 0.525066592 |
| <b>Q8BP47</b> | 0.22650853  | 0.250961574  | 0.862748926 |
| <b>Q9JHI5</b> | 0.239398042 | 0.668119125  | 1.520799374 |
| <b>B7ZNG4</b> | 0.360083296 | 0.096261853  | 0.403813062 |
| <b>Q921W0</b> | 0.456806149 | 0.432424977  | 0.699551633 |
| <b>P62311</b> | 0.911499849 | 0.536550296  | 1.13422094  |
| <b>Q8BTV2</b> | 0.998195503 | 0.536550296  | 1.246408087 |
| <b>Q61239</b> | 1.033863452 | 0.566084491  | 1.181102551 |

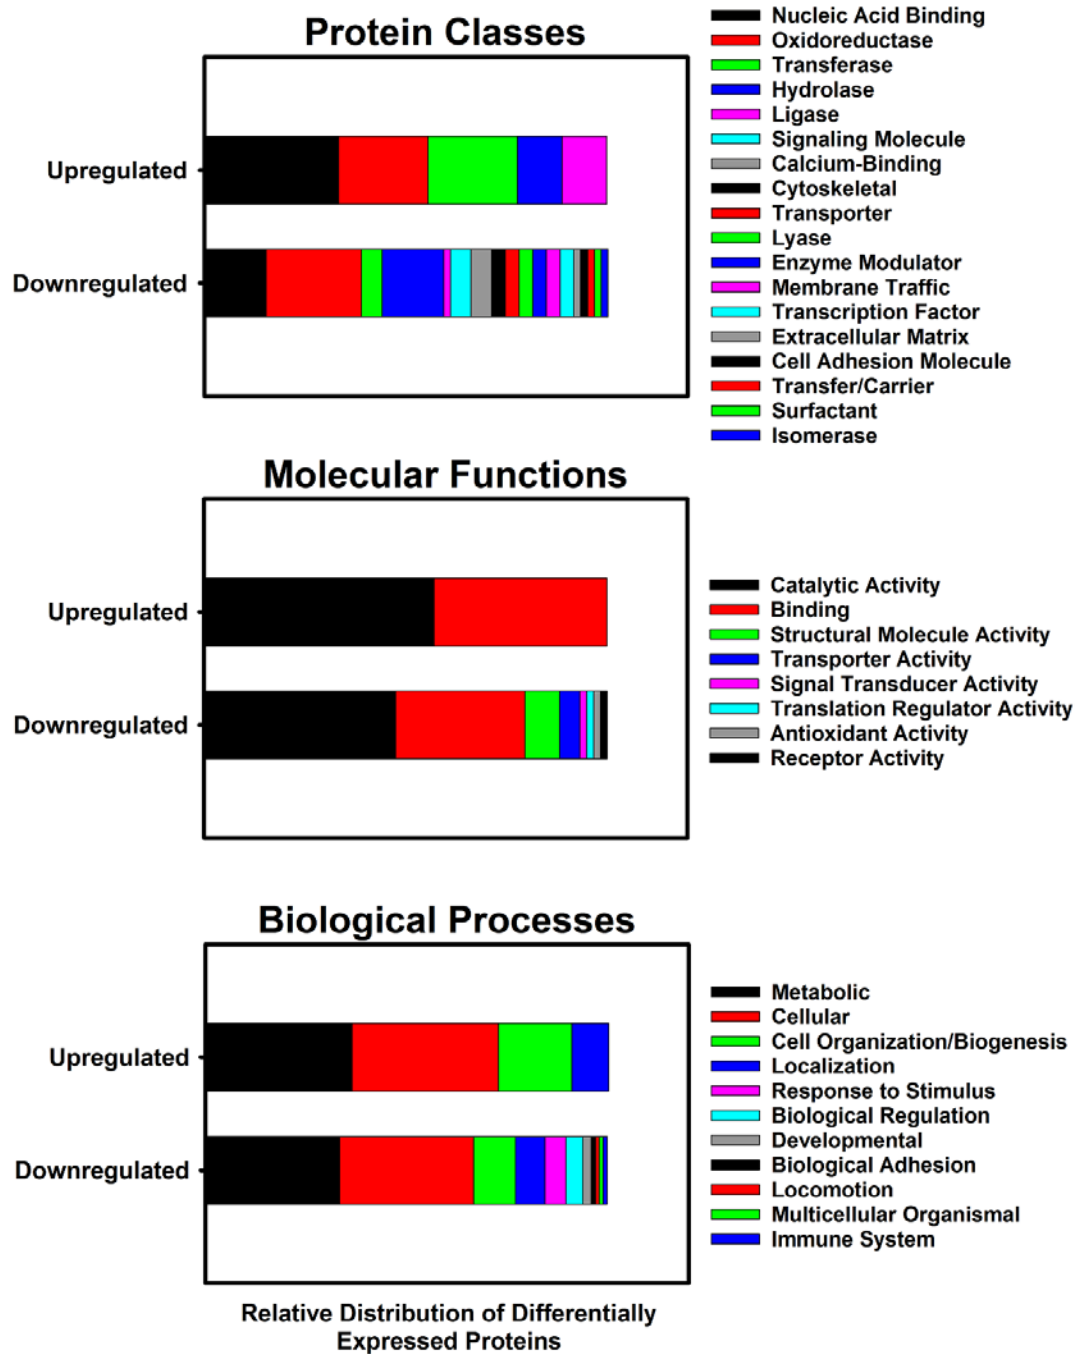

**Supplemental Figure 1: PANTHER ontology classification distributions of proteins differentially expressed in BTHS - A) Distribution of protein classifications in up (top) or down (bottom) regulated proteins. B) Distribution of molecular functions in up (top) or down (bottom) regulated proteins. C) Distribution of biological processes in up (top) or down (bottom) regulated proteins.**

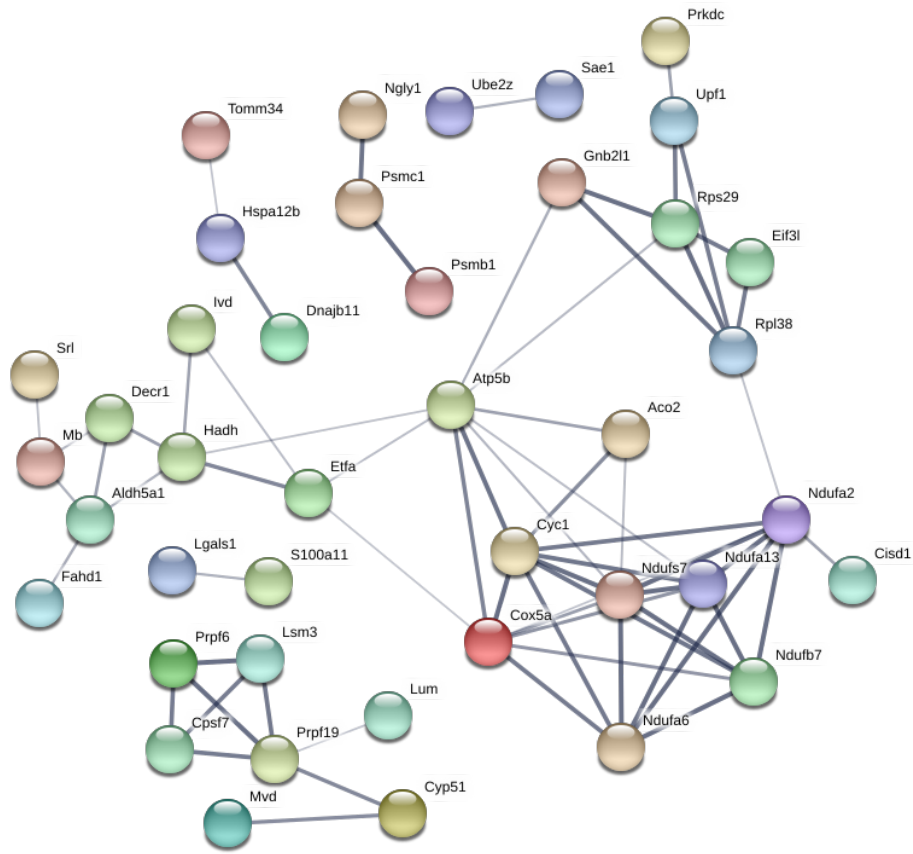

**Supplemental Figure 2: STRING interaction diagram.** STRING 10.2 analysis of all proteins found to be dysregulated in BTHS revealed multiple interactive groups. Line thickness indicates the strength of data support.

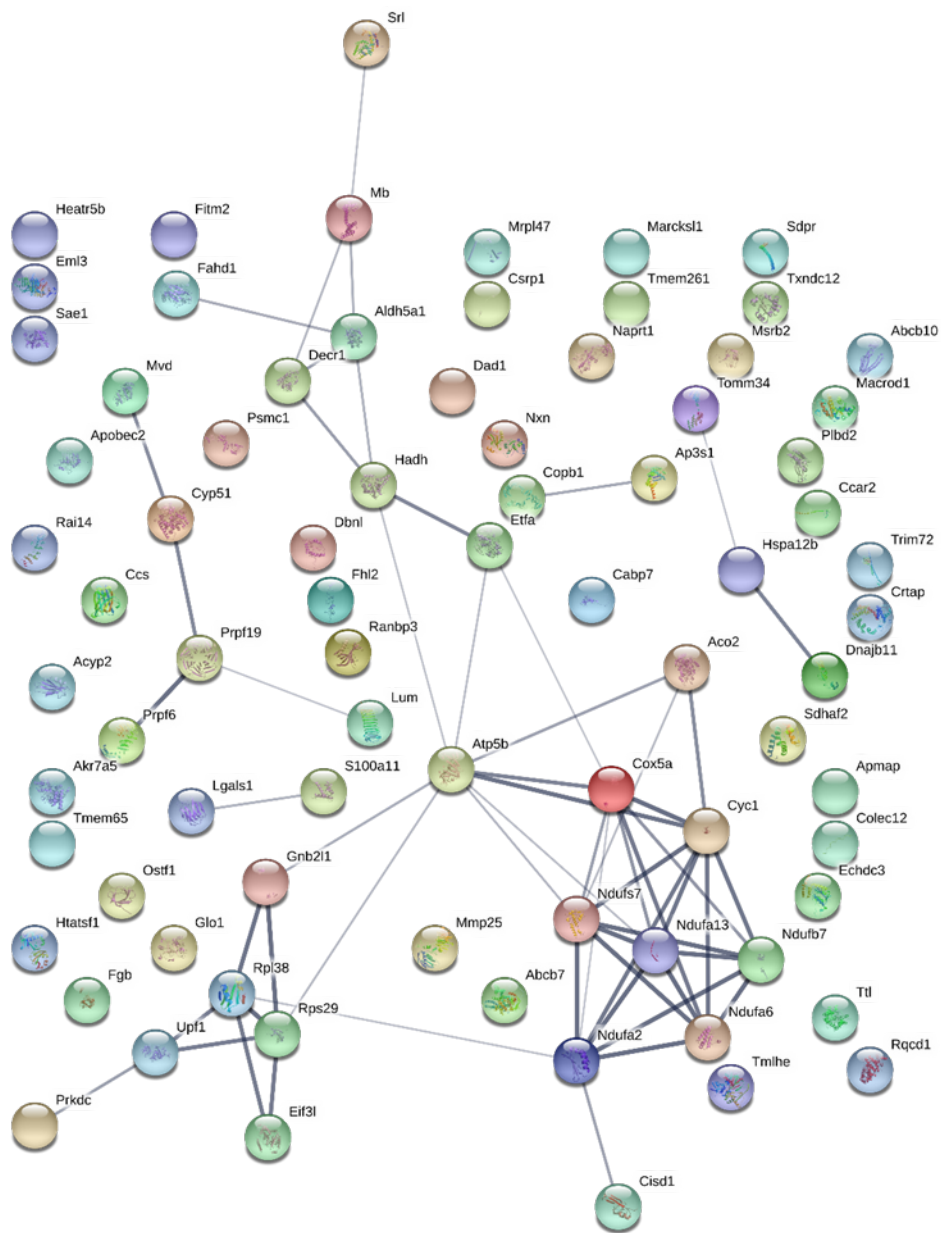

**Supplemental Figure 3: STRING interaction diagram.** STRING 10.2 analysis of all proteins down-regulated in BTHS. Line thickness indicates the strength of data support.

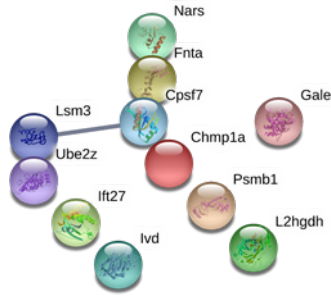

**Supplemental Figure 4: STRING interaction diagram.** STRING 10.2 analysis of all proteins up-regulated in BTHS. Line thickness indicates the strength of data support.

**Supplemental Table 2: STRING Identified Biological Processes from proteins dysregulated in BTHS.**

| #pathway ID | pathway description               | observed count | gene |
|-------------|-----------------------------------|----------------|------|
| GO.0055114  | oxidation-reduction process       | 22             |      |
| GO.0044710  | single-organism metabolic process | 34             |      |
| GO.0008152  | metabolic process                 | 51             |      |

**Supplemental Table 3: STRING Identified Molecular Functions from proteins dysregulated in BTHS.**

| #pathway ID | pathway description                        | observed count | gene |
|-------------|--------------------------------------------|----------------|------|
| GO.0016491  | oxidoreductase activity                    | 18             |      |
| GO.0003824  | catalytic activity                         | 42             |      |
| GO.0008137  | NADH dehydrogenase (ubiquinone) activity   | 4              |      |
| GO.0043167  | ion binding                                | 38             |      |
| GO.0016651  | oxidoreductase activity, acting on NAD(P)H | 5              |      |
| GO.0003674  | Molecular function                         | 59             |      |
| GO.0048037  | cofactor binding                           | 7              |      |
| GO.0050662  | coenzyme binding                           | 6              |      |
| GO.0046914  | transition metal ion binding               | 15             |      |
| GO.0036094  | small molecule binding                     | 21             |      |



**Supplemental Table 4:** STRING Identified KEGG Pathways from proteins dysregulated in BTHS.

| #pathway ID | pathway description                          | observed gene count |
|-------------|----------------------------------------------|---------------------|
| 190         | Oxidative phosphorylation                    | 8                   |
| 5012        | Parkinson s disease                          | 8                   |
| 5010        | Alzheimer s disease                          | 8                   |
| 5016        | Huntington s disease                         | 8                   |
| 4932        | Non-alcoholic fatty liver disease (NAFLD)    | 7                   |
| 1100        | Metabolic pathways                           | 17                  |
| 650         | Butanoate metabolism                         | 3                   |
| 1120        | Microbial metabolism in diverse environments | 5                   |

**Supplemental Table 5:** List of up-regulated proteins that were rescued following neonatal (blue) or both ages of (light green) treatment and their respective functions. (Function Adapted from UniProtKB Data Bank<sup>1</sup>)

| Uniprot ID | Protein                                | Expression level in BTHS | Gene   | Function                                                                                                                                                                                                                                             |
|------------|----------------------------------------|--------------------------|--------|------------------------------------------------------------------------------------------------------------------------------------------------------------------------------------------------------------------------------------------------------|
| Q8R059     | UDP-glucose 4-epimerase                | Upregulated              | Gale   | UDP-Gal plays a critical role in the pathway of galactose catabolism in which galactose is converted to the glycolytic intermediate glucose 6-phosphate. UDP-sugar interconversions are important in the synthesis of glycoproteins and glycolipids. |
| Q3UE20     | Amine oxidase                          | Upregulated              | N/A    | Catalyzes the oxidative deamination and formation of corresponding aldehyde, hydrogen peroxide an ammonia.                                                                                                                                           |
| Q921W0     | Charged multivesicular body protein 1a | Upregulated              | Chmp1a | Associated component of the endosomal sorting required for transport complex III that is involved in multivesicular                                                                                                                                  |

|        |                                                   |             |        |                                                                                                                                                                                                                                                                      |
|--------|---------------------------------------------------|-------------|--------|----------------------------------------------------------------------------------------------------------------------------------------------------------------------------------------------------------------------------------------------------------------------|
|        |                                                   |             |        | body (MVB) formation and sorting.                                                                                                                                                                                                                                    |
|        |                                                   |             |        |                                                                                                                                                                                                                                                                      |
| Q91YP0 | L-2-hydroxyglutarate dehydrogenase, mitochondrial | Upregulated | L2hgdh | Converts L-2-hydroxyglutarate to 2-ketoglutarate that after subsequent process produces energy.                                                                                                                                                                      |
| O09061 | Proteasome subunit beta type-1                    | Upregulated | Psmb1  | Component of the 20S core proteasome complex that is involved in the proteolytic degradation of intracellular proteins. Associated with 19S regulatory particles, forms the 26S proteasome. Participates in the ATP-dependent degradation of ubiquitinated proteins. |
| Q3UE37 | Ubiquitin-conjugating enzyme E2 Z                 | Upregulated | Ube2z  | Catalyzes the covalent attachment of ubiquitin to other proteins. May be involved in apoptosis regulation.                                                                                                                                                           |
| Q8BP47 | Asparagine-tRNA ligase, cytoplasmic               | Upregulated | Nars   | Catalyzes the ligation of an amino acid to its cognate transfer RNA molecule in a highly specific reaction.                                                                                                                                                          |
| Q9JH15 | Isovaleryl-CoA dehydrogenase, mitochondrial       | Upregulated | Ivd    | Mitochondrial matrix enzyme that catalyzes the third step in leucine metabolism.                                                                                                                                                                                     |

**Supplemental Table 6:** List of proteins that are not rescued after treatment and respective function. (Function Adapted from UniProtKB Data Bank)

| <b>Uniprot ID</b> | <b>Protein</b>                                                              | <b>Expression level in BTHS</b> | <b>Gene</b> | <b>Function</b>                                                                                                                                                                                                               |
|-------------------|-----------------------------------------------------------------------------|---------------------------------|-------------|-------------------------------------------------------------------------------------------------------------------------------------------------------------------------------------------------------------------------------|
| Q91ZE0            | Trimethyllysine dioxygenase, mitochondrial                                  | Downregulated                   | Tmlhe       | Converts trimethyllysine (TML) into hydroxytrimethyllysine (HTML).                                                                                                                                                            |
| P61804            | Dolichyl-diphosphooligosaccharide--protein glycosyltransferase subunit DAD1 | Downregulated                   | Dad1        | Subunit of oligosaccharyl transferase and participates in the first step in protein N-glycosylation.                                                                                                                          |
| Q9JI39            | ATP-binding cassette sub-family B member 10, mitochondrial                  | Downregulated                   | Abcb10      | May mediate critical mitochondrial transport functions related to heme biosynthesis.                                                                                                                                          |
| Q9DCR2            | AP-3 complex subunit sigma-1                                                | Downregulated                   | Ap3s1       | It facilitates the budding of vesicles from the Golgi membrane and may be directly involved in trafficking to lysosomes.                                                                                                      |
| Q91YR7            | Pre-mRNA-processing factor 6                                                | Downregulated                   | Prpf6       | Involved in pre-mRNA splicing. Enhances dihydrotestosterone-induced transactivation activity of AR, as well as dexamethasone-induced transactivation activity of NR3C1, but does not affect estrogen-induced transactivation. |
|                   |                                                                             |                                 |             |                                                                                                                                                                                                                               |
| Q9D0P8            | Intraflagellar transport protein 27 homolog                                 | Upregulated                     | Ift27       | Essential for male fertility, spermiogenesis and sperm flagella formation. Plays a role in the early development of the kidney. May be involved in the regulation of ureteric bud initiation.                                 |
| P62311            | U6 snRNA-associated Sm-like protein LSm3                                    | Upregulated                     | Lsm3        | Plays role in pre-mRNA splicing as component of the U4/U6-U5 tri-snRNP complex that is involved in spliceosome assembly, and as component of the                                                                              |

|        |                                                                            |             |       |                                                                                                                                                                                                                 |
|--------|----------------------------------------------------------------------------|-------------|-------|-----------------------------------------------------------------------------------------------------------------------------------------------------------------------------------------------------------------|
|        |                                                                            |             |       | precatalytic spliceosome (spliceosome B complex).                                                                                                                                                               |
| Q8BTV2 | Cleavage and polyadenylation specificity factor subunit 7                  | Upregulated | Cpsf7 | Component of the cleavage factor Im (CFIm) complex that functions as an activator of the pre-mRNA 3'-end cleavage and polyadenylation processing required for the maturation of pre-mRNA into functional mRNAs. |
| Q61239 | Protein farnesyltransferase/geranylgeranyltransferase type-1 subunit alpha | Upregulated | Fnta  | Contributes either a farnesyl group or a geranylgeranyl group in thioether linkage to the cysteine residue of proteins with a C-terminal CAAX box.                                                              |

**Supplemental Table 7:** List of proteins rescued following either adult (green) or neonatal (blue) treatment and their respective functions. (Function Adapted from UniProtKB Data Bank<sup>1</sup>)

| Uniprot ID | Protein                                             | Expression level in BTHS | Gene   | Function                                                                                                                                                                                                                                 |
|------------|-----------------------------------------------------|--------------------------|--------|------------------------------------------------------------------------------------------------------------------------------------------------------------------------------------------------------------------------------------------|
| Q9CPU0     | Lactoylglutathione lyase                            | Downregulated            | Glo1   | Catalyzes the conversion of hemimercaptal, formed from methylglyoxal and glutathione, to S-lactoylglutathione. Involved in the regulation of TNF-induced transcriptional activity of NF-kappa-B. Required for normal osteoclastogenesis. |
| Q9CYD3     | Cartilage-associated protein                        | Downregulated            | Crtap  | Necessary for efficient 3-hydroxylation of fibrillar collagen prolyl residues.                                                                                                                                                           |
| Q8K2Y7     | 39S ribosomal protein L47, mitochondrial            | Downregulated            | Mrpl47 | Structural constituent of ribosome. Mitochondrial translation.                                                                                                                                                                           |
| Q62422     | Osteoclast-stimulating factor 1                     | Downregulated            | Ostf1  | Induces bone resorption, acting probably through a signaling cascade which results in the secretion of factor(s) enhancing osteoclast formation and activity.                                                                            |
| Q3TCN2     | Putative phospholipase B-like 2                     | Downregulated            | Plbd2  | Hydrolase activity. Lipid catabolic process.                                                                                                                                                                                             |
| Q61425     | Hydroxyacyl-coenzyme A dehydrogenase, mitochondrial | Downregulated            | Hadh   | Plays an essential role in the mitochondrial beta-oxidation of short chain fatty acids. Exerts it highest activity toward 3-hydroxybutyryl-CoA.                                                                                          |
| Q8CC86     | Nicotinate phosphoribosyltransferase                | Downregulated            | Naprt  | Catalyzes the first step in the biosynthesis of NAD from nicotinic acid, the ATP-dependent synthesis of beta-nicotinate D-ribonucleotide from nicotinate and 5-phospho-D-ribose 1-                                                       |

|        |                                        |               |        |                                                                                                                                                                                                                                                      |
|--------|----------------------------------------|---------------|--------|------------------------------------------------------------------------------------------------------------------------------------------------------------------------------------------------------------------------------------------------------|
|        |                                        |               |        | phosphate. Helps prevent cellular oxidative stress via its role in NAD biosynthesis.                                                                                                                                                                 |
| P38585 | Tubulin--tyrosine ligase               | Downregulated | Ttl    | Catalyzes the post-translational addition of a tyrosine to the C-terminal end of detyrosinated alpha-tubulin.                                                                                                                                        |
|        |                                        |               |        |                                                                                                                                                                                                                                                      |
| Q8R059 | UDP-glucose 4-epimerase                | Upregulated   | Gale   | UDP-Gal plays a critical role in the pathway of galactose catabolism in which galactose is converted to the glycolytic intermediate glucose 6-phosphate. UDP-sugar interconversions are important in the synthesis of glycoproteins and glycolipids. |
| Q3UE20 | Amine oxidase                          | Upregulated   | N/A    | Catalyzes the oxidative deamination and formation of corresponding aldehyde, hydrogen peroxide and ammonia.                                                                                                                                          |
| Q921W0 | Charged multivesicular body protein 1a | Upregulated   | Chmp1a | Associated component of the endosomal sorting required for transport complex III that is involved in multivesicular body (MVB) formation and sorting.                                                                                                |

**Supplemental Table 8:** Primers used in quantitative RT-PCR

| Gene                                       |         | Catalog       | Company           |
|--------------------------------------------|---------|---------------|-------------------|
| Glyceraldehyde-3-phosphate dehydrogenase   | GAPDH   | Mm99999915_g1 | Thermo Scientific |
| 4 ½ LIM 2 protein                          | Fhl2    | Mm00515781_m1 | Thermo Scientific |
| Lumican                                    | Lum     | Mm01248292_m1 | Thermo Scientific |
| Fat storage-inducing transmembrane protein | Fitm2   | Mm04212060_m1 | Thermo Scientific |
| Trimethyllysine dioxygenase                | Tmlhe   | Mm00454748_m1 | Thermo Scientific |
| Heat Shock 70 KDa Protein 12B              | Hspa12b | Mm01329626_m1 | Thermo Scientific |
| Transmembrane protein 65                   | Tmem65  | Mm01207874_m1 | Thermo Scientific |

**Supplemental Table 9:** Antibodies used in western blotting (WB) and immunohistochemistry (I).

| Protein                                  |        | Dilution (WB / I) | Company                  |
|------------------------------------------|--------|-------------------|--------------------------|
| Glyceraldehyde-3-phosphate dehydrogenase | GAPDH  | 1:5000 / -        | Cell Signaling #2118     |
| Cytochrome C oxidase subunit II          | MTCO2  | - / 1:200         | Abcam #ab110258          |
| Transmembrane protein 65                 | Tmem65 | 1:250 / -         | Sigma Aldrich #HPA025020 |
| Connexin-43                              | Cx43   | 1:500 / 1:400     | Sigma Aldrich #C6219     |

1. The UniProt, C (2017). UniProt: the universal protein knowledgebase. *Nucleic acids research* **45**: D158-D169.
